# Supplementary material
Source: publisher figshare collection journal article supplement (https://tandf.figshare.com/ndownloader/files/18154745)
Supplement: Supplementary file 1 [file 18154745]

**Supplementary Information**


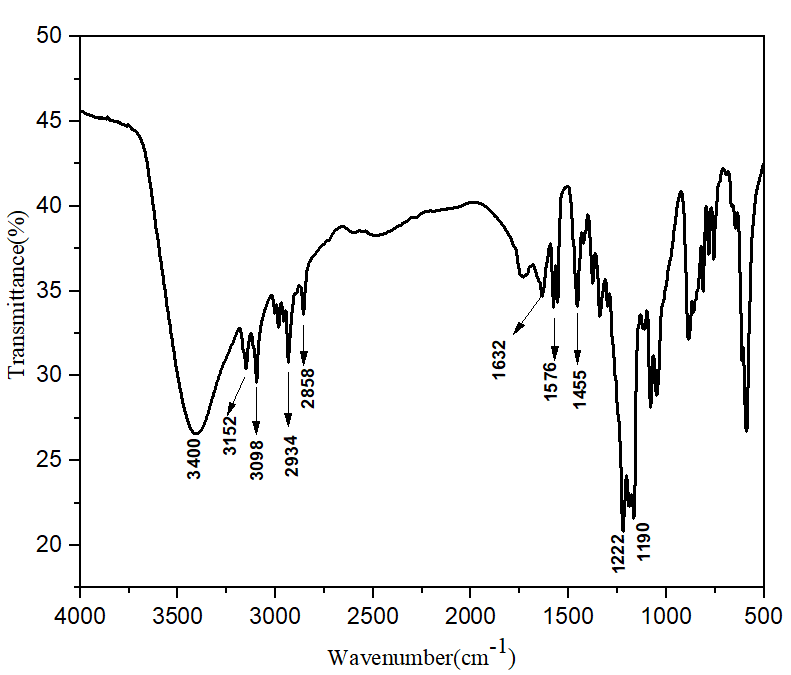


**Fig. 1.**  FT-IR spectra of [Tmim] [HSO4]4


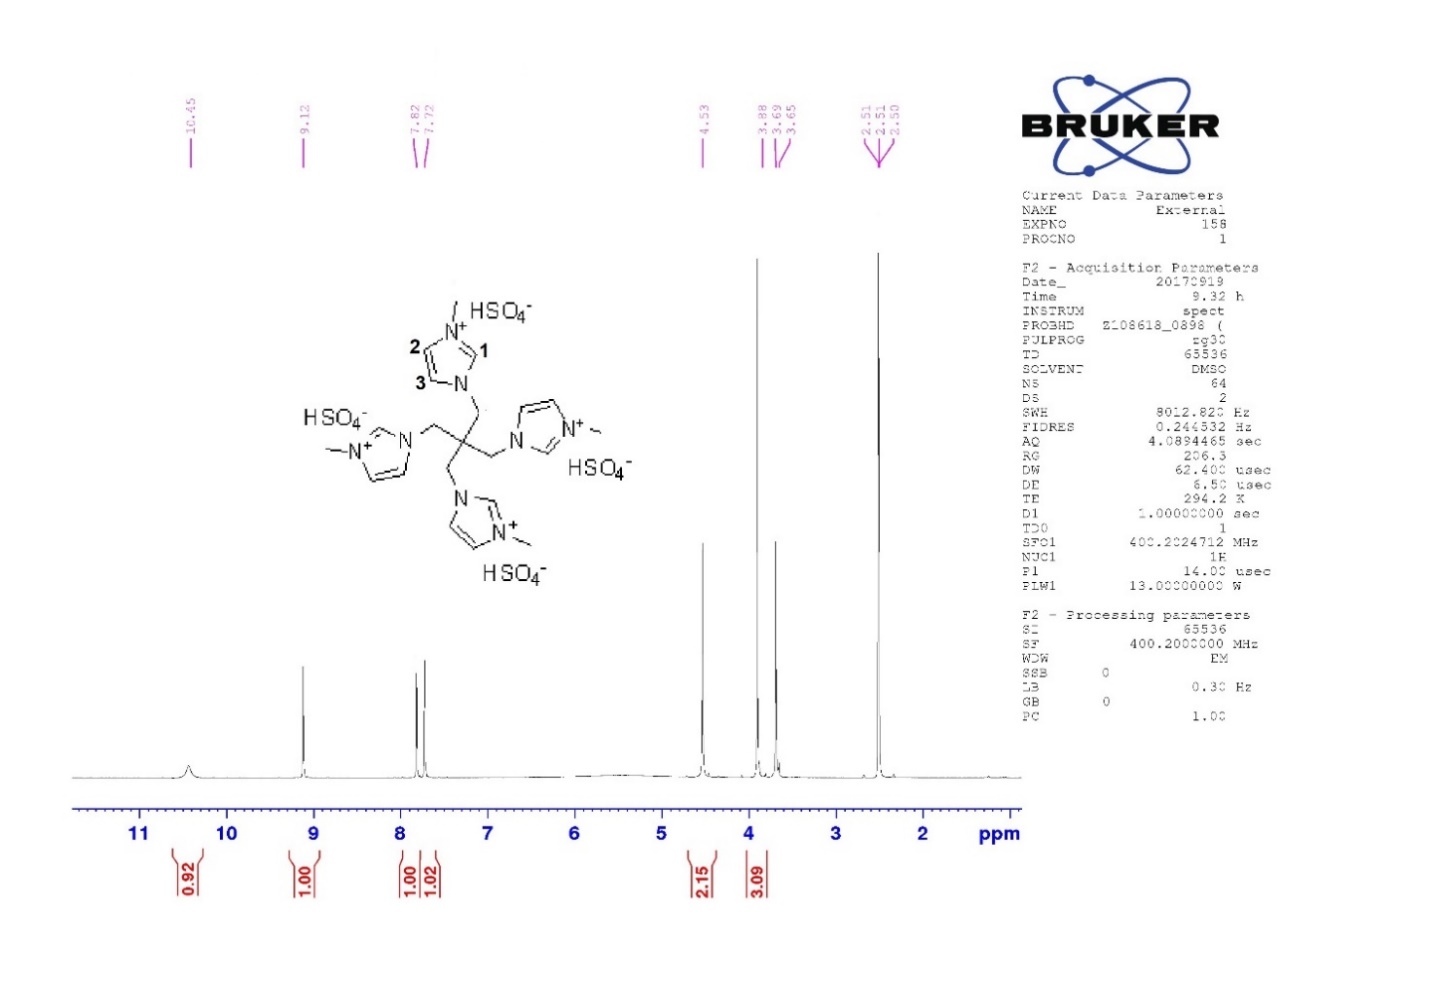


**Fig. 2.** 400 MHz 1H NMR spectrum in DMSO of [Tmim] [HSO4]4


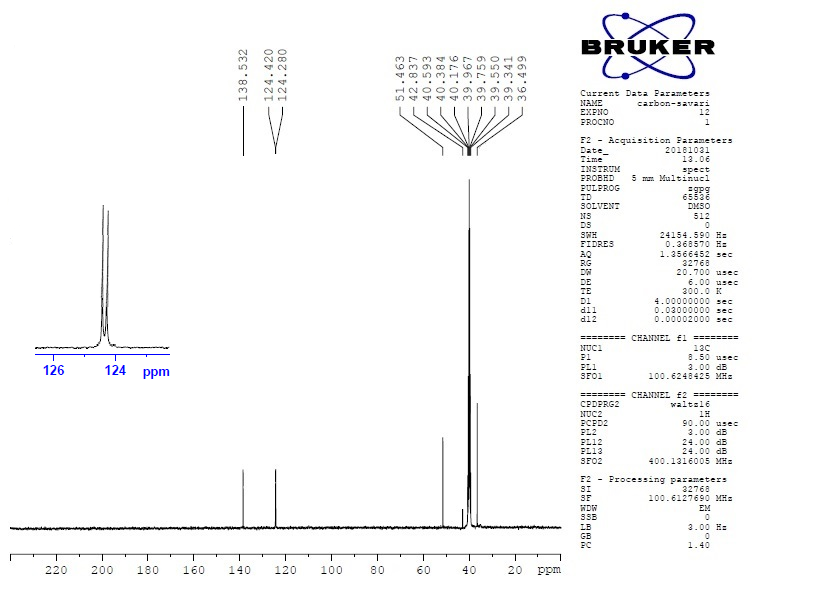


**Fig. 3.** 400 MHz 13C NMR spectrum in DMSO of [Tmim] [HSO4]4


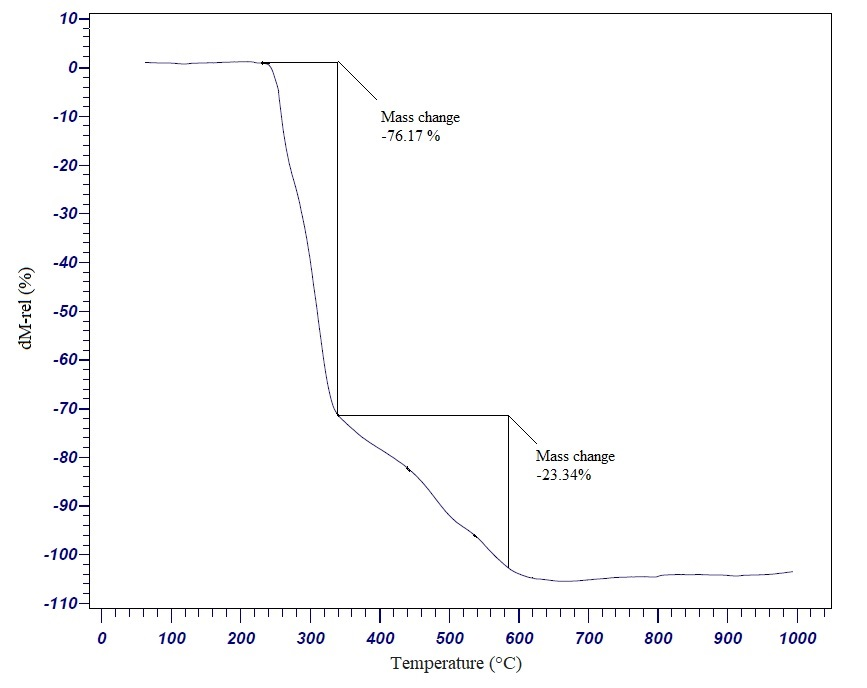


**Fig. 4.** TGA curve of [Tmim] [HSO4]4
